# Supplementary material for: One-pot synthesis of Ag–Cu–Cu2O/C nanocomposites derived from a metal–organic framework as a photocatalyst for borylation of aryl halide
Source: Royal Society of Chemistry journal article supplement (doi:10.1039/d1ra05586k), 2021-01-01
Supplement: d1ra05586k1.pdf [file d1ra05586k1.pdf]

## Electronic Supplementary Information

### **One-pot synthesis of Ag-Cu-Cu<sub>2</sub>O/C nanocomposites derived from Metal-Organic Framework for photocatalyst in borylation of aryl halide**

Dicky Annas<sup>1</sup>, Shamim Ahmd Hira<sup>1</sup>, Sehwan Song<sup>2</sup>, Jong-Seong Bae<sup>3</sup>, Sungkyun Park<sup>2</sup>, Kang Hyun Park<sup>1,4\*</sup>

<sup>1</sup>*Department of Chemistry, Pusan National University, Busan 46241, South Korea*

<sup>2</sup>*Department of Physics, Pusan National University, Busan 46241, South Korea*

<sup>3</sup>*Busan Center, Korea Basic Science Institute, Busan 46742, South Korea*

<sup>4</sup>*SoulDot Co., Ltd, Pusan National University, Busandaehak-ro 63beon-gil, Geumjeong-gu, Busan 46241, Korea*

\* Correspondence: [chemistry@pusan.ac.kr](mailto:chemistry@pusan.ac.kr) (K.H.P)

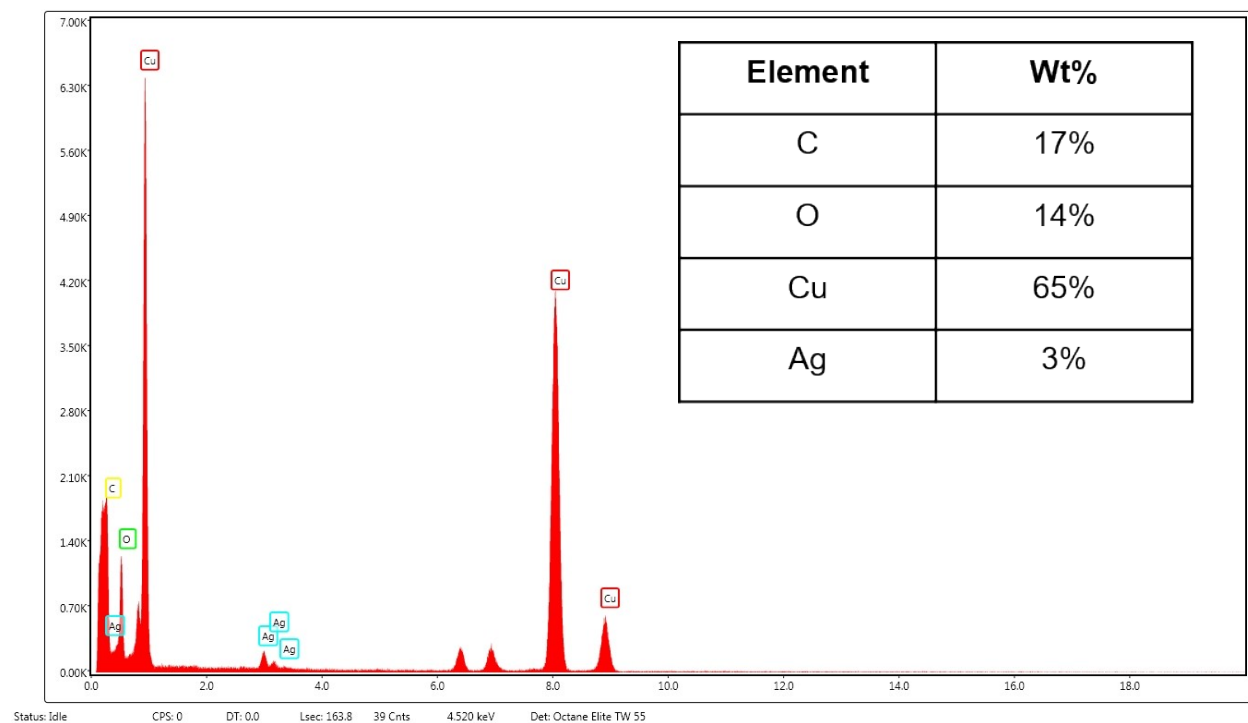

**Fig. S1.** Energy-dispersive X-ray spectrometry (EDS) spectrum of Ag-Cu-Cu<sub>2</sub>O/C nanocomposites.

Line#:1 R.Time:15.790(Scan#:2959)

MassPeaks:378

RawMode:Single 15.790(2959) BasePeak:233.70(37279)

BG Mode:None Group 1 - Event 1

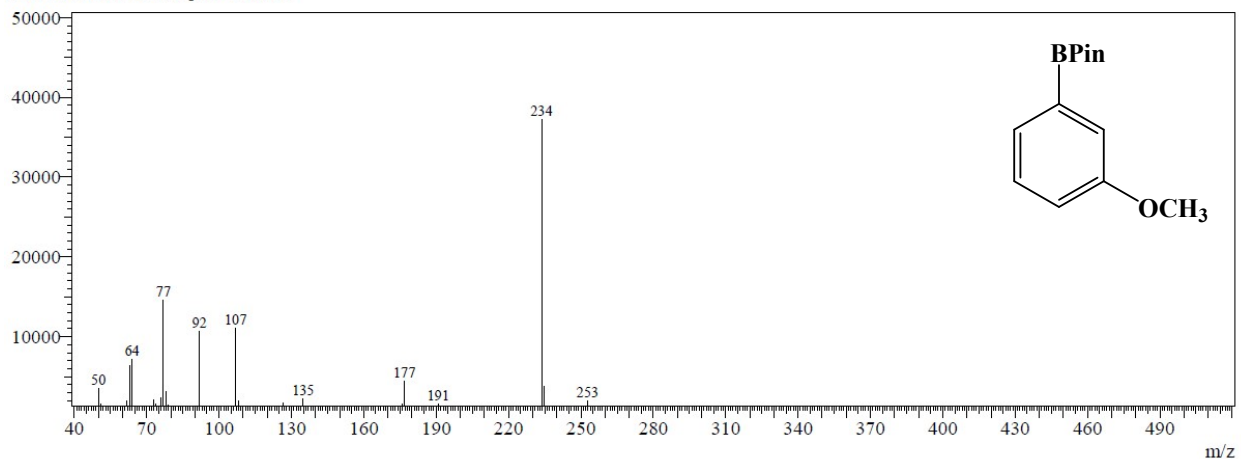

Line#:1 R.Time:15.840(Scan#:2969)  
MassPeaks:442  
RawMode:Single 15.840(2969) BasePeak:233.75(8412825)  
BG Mode:None Group 1 - Event 1

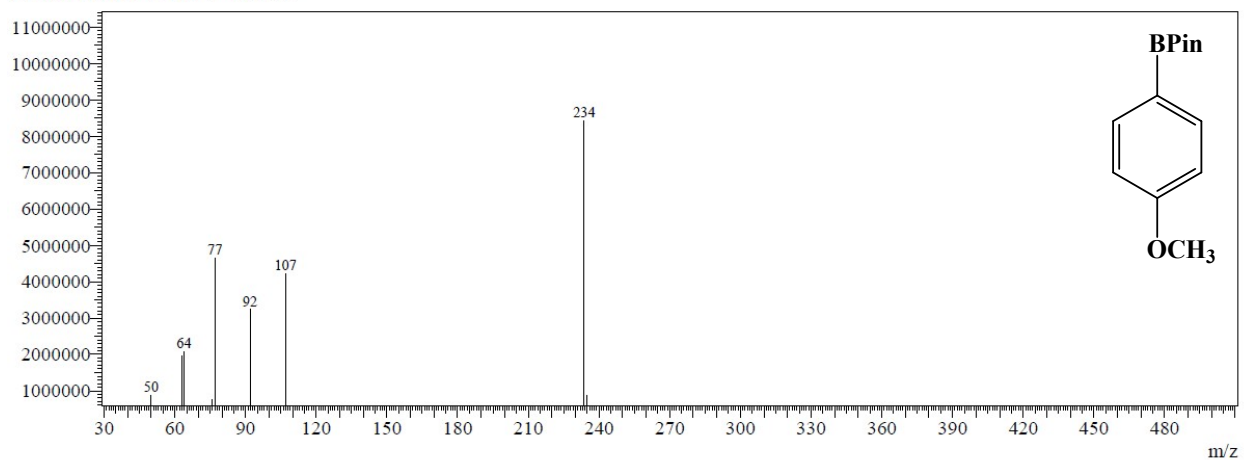

Line#:1 R.Time:17.390(Scan#:3279)  
MassPeaks:407  
RawMode:Single 17.390(3279) BasePeak:219.90(5843345)  
BG Mode:None Group 1 - Event 1

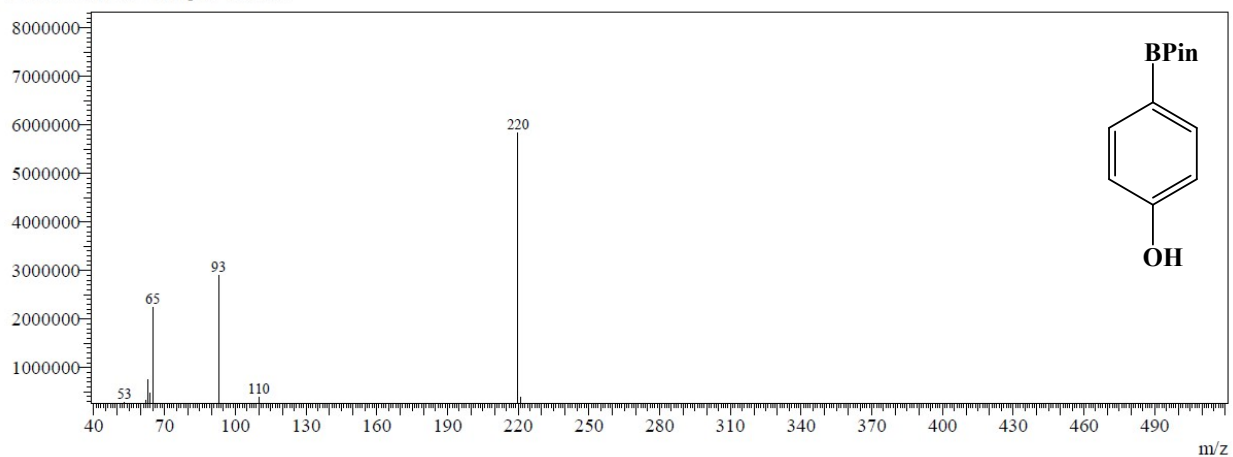

Line#:1 R.Time:18.120(Scan#:3425)  
MassPeaks:433  
RawMode:Single 18.120(3425) BasePeak:230.95(8471719)  
BG Mode:None Group 1 - Event 1

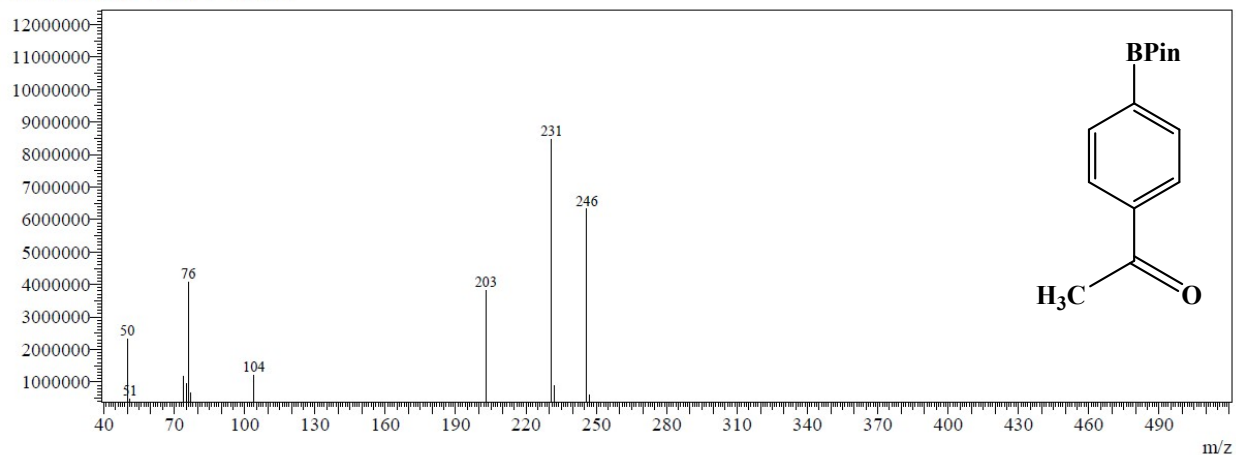

Line#:1 R.Time:14.840(Scan#:2769)  
MassPeaks:359  
RawMode:Single 14.840(2769) BasePeak:58.05(1559716)  
BG Mode:None Group 1 - Event 1

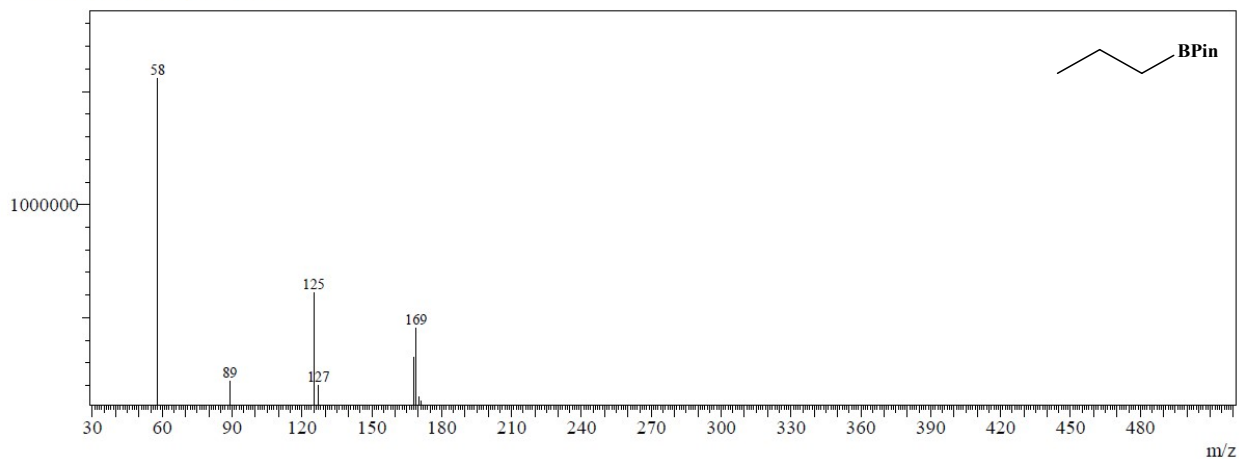

Line#:1 R.Time:21.850(Scan#:4171)  
MassPeaks:411  
RawMode:Single 21.850(4171) BasePeak:91.05(8427143)  
BG Mode:None Group 1 - Event 1

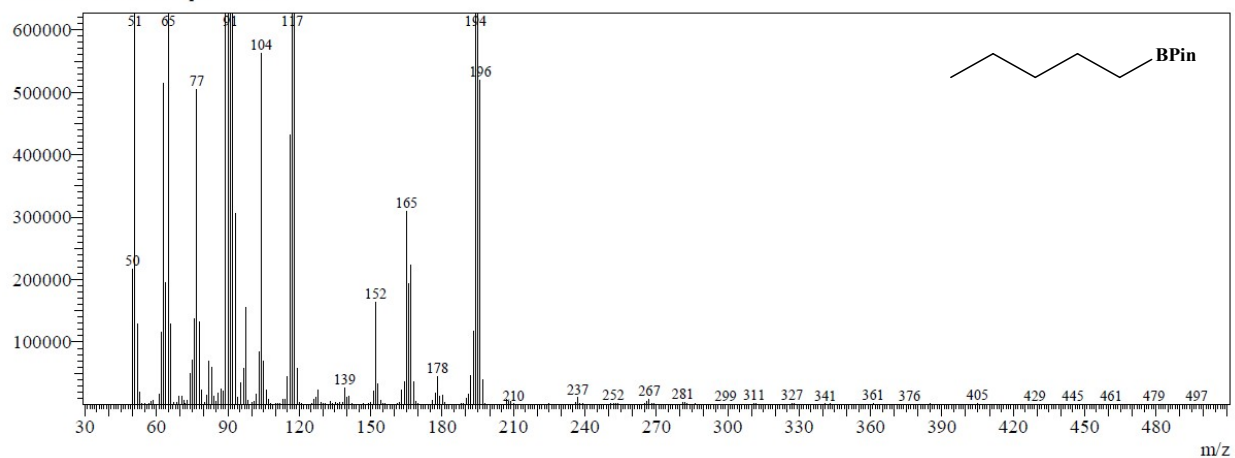

Line#:1 R.Time:20.640(Scan#:3929)  
MassPeaks:381  
RawMode:Single 20.640(3929) BasePeak:254.95(1591887)  
BG Mode:None Group 1 - Event 1

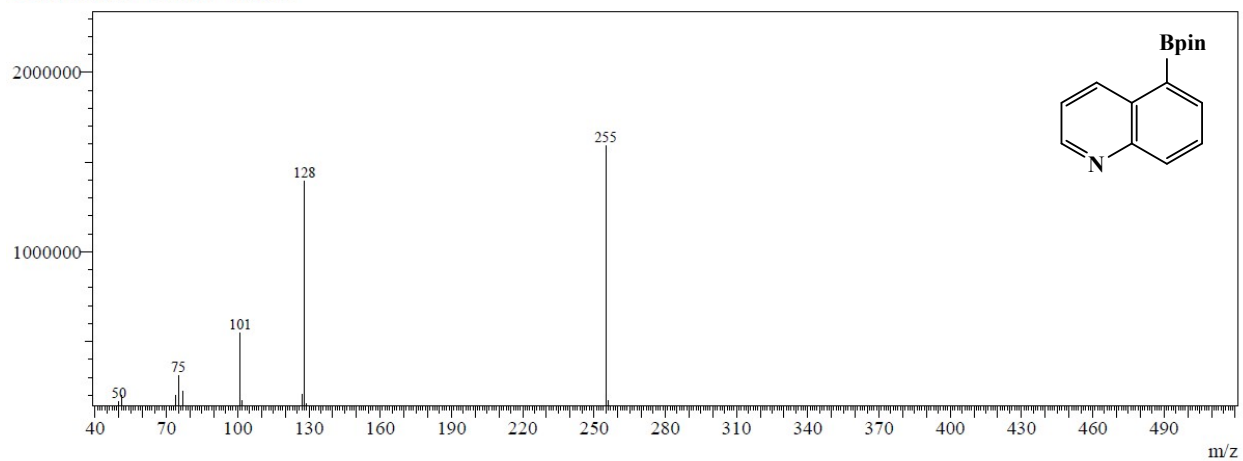

Line#:1 R.Time:16.630(Scan#:3127)  
MassPeaks:418  
RawMode:Single 16.630(3127) BasePeak:257.10(1894633)  
BG Mode:None Group 1 - Event 1

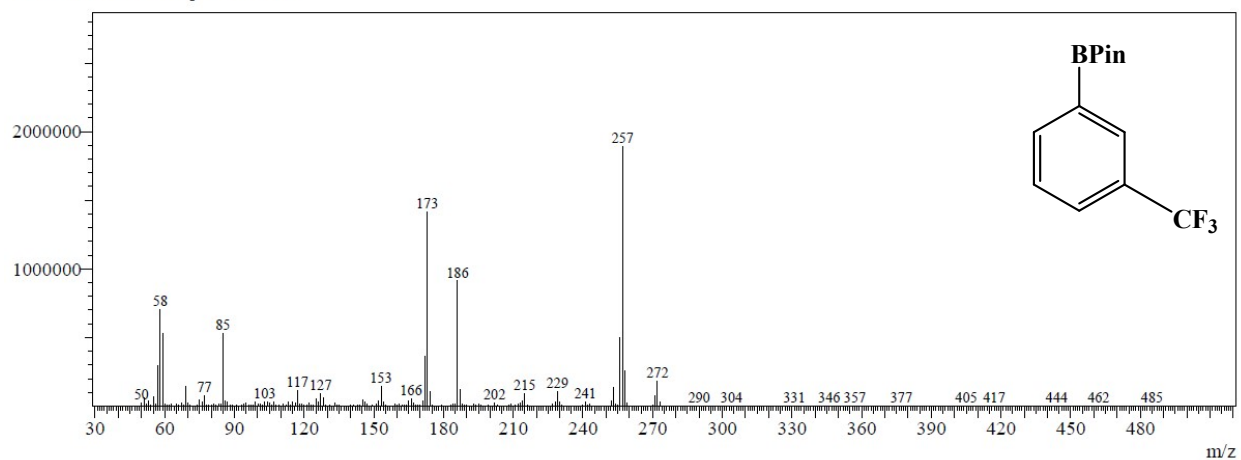

Line#:1 R.Time:21.030(Scan#:4007)  
MassPeaks:403  
RawMode:Single 21.030(4007) BasePeak:126.95(8109679)  
BG Mode:None Group 1 - Event 1

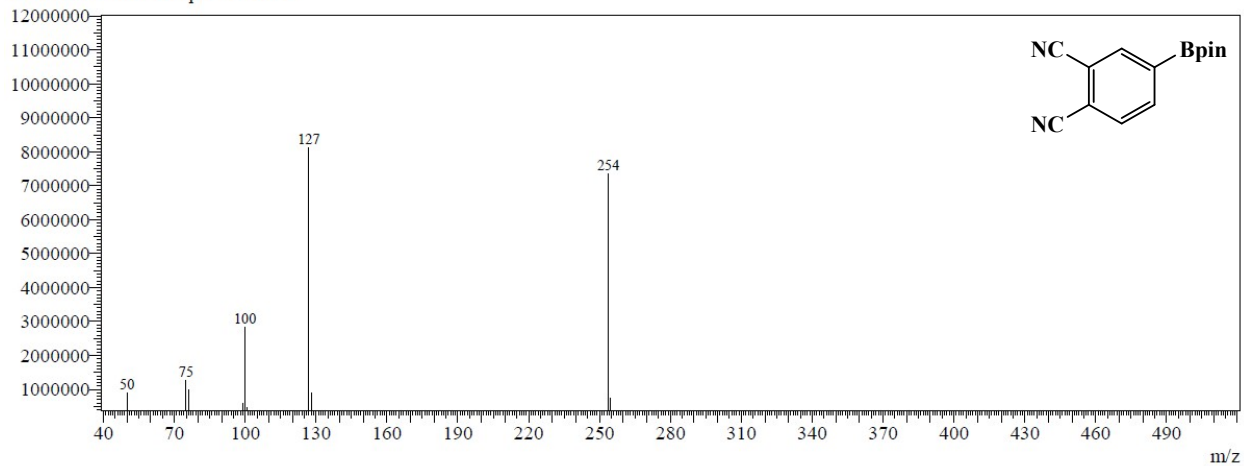

**Fig. S2.** Mass spectra of borylation of alkyl halide reaction using various scope of alkyl halide
